# Supplementary material
Source: PubMed Central journal article supplement (PMC7966002)
Supplement: 2801_table.pdf [file 2801_table.pdf]

**On-line Table 1: Clinical data of children with MRI-visible FCD and MRI-negative localization-related epilepsy**

| Case/Age (yr)/Sex | Age at Seizure Onset (yr) | Duration of Epilepsy (yr) | Conventional MR Imaging     | Video EEG                    | MEG Dipole Cluster       | Invasive monitoring                                                 | Histology                                                                                              | Seizure Outcome Following Surgery (Follow-Up Duration) |
|-------------------|---------------------------|---------------------------|-----------------------------|------------------------------|--------------------------|---------------------------------------------------------------------|--------------------------------------------------------------------------------------------------------|--------------------------------------------------------|
| 1/11.6/F          | 2                         | 9                         | R mesial frontal FCD        | R frontal                    | R frontal                | R frontal                                                           | FCD                                                                                                    | Seizure-free (1 yr)                                    |
| 2/15.7/F          | 4                         | 11                        | Normal                      | L frontal                    | L frontal                |                                                                     |                                                                                                        |                                                        |
| 3/16.1/F          | 3                         | 13                        | Normal                      | R peri-rolandic              | R peri-rolandic          | R peri-rolandic <sup>a</sup>                                        |                                                                                                        |                                                        |
| 4/16.9/M          | 4                         | 13                        | Normal                      | L frontal                    | L frontal                | L frontal                                                           | FCD                                                                                                    | >50% improvement (2 yr)                                |
| 5/14.9/M          | 14                        | 0.9                       | L rolandic FCD              | L peri-rolandic              | L peri-rolandic          | L peri-rolandic                                                     | FCD                                                                                                    | >50% improvement (1 yr)                                |
| 6/14.5/F          | 0.3                       | 14                        | Normal                      | R hemispheric                | R parietal and occipital |                                                                     |                                                                                                        |                                                        |
| 7/18.1/F          | 3                         | 15                        | Normal                      | R frontal                    | R frontal                | R frontal                                                           | FCD                                                                                                    | >50% improvement (2 yr)                                |
| 8/7.3/F           | 1                         | 6                         | Normal                      | R frontal                    | R frontal                |                                                                     |                                                                                                        |                                                        |
| 9/11.2/M          | 0.3                       | 10                        | L temporal FCD              | L frontal and temporal       | L frontal and temporal   | L frontal and temporal                                              | FCD                                                                                                    | Seizure-free (1 yr)                                    |
| 10/12.4/M         | 3                         | 9                         | L parietal and rolandic FCD | L parietal and peri-rolandic | L parietal and frontal   | L parietal and peri-rolandic                                        | FCD                                                                                                    | Seizure-free (1 yr)                                    |
| 11/14.0/F         | 6                         | 8                         | Normal                      | R frontal                    | R frontal                | R frontal                                                           | Heterotopic neurons in white matter; cortical gliosis                                                  | >50% improvement (1 yr)                                |
| 12/5.9/M          | 5                         | 0.7                       | Normal                      | L frontal                    | L frontal                |                                                                     |                                                                                                        |                                                        |
| 13/9.0/F          | 1.3                       | 7                         | Normal                      | L frontal                    | L frontal                |                                                                     |                                                                                                        |                                                        |
| 14/17.6/M         | 13                        | 4                         | Normal                      | L frontal                    | L frontal                |                                                                     |                                                                                                        |                                                        |
| 15/9.0/F          | 1                         | 8                         | Normal                      | L frontal                    | L frontal and parietal   |                                                                     |                                                                                                        |                                                        |
| 16/18.5/F         | 15                        | 3                         | Normal                      | L frontal                    | L frontal and parietal   |                                                                     |                                                                                                        |                                                        |
| 17/6.5/M          | 0.7                       | 5                         | Normal                      | Bifrontal                    | L frontal                | L frontal                                                           | Heterotopic neurons in white matter; cortical gliosis; increased number of oligodendroglial-like cells | >50% improvement (1 yr)                                |
| 18/9.4/F          | 4                         | 5                         | L temporal FCD              | L temporal                   | L temporal               | No invasive monitoring, but underwent L anterior temporal lobectomy | FCD                                                                                                    | <50% improvement (2 yr)                                |
| 19/7.3/F          | 5                         | 2                         | L frontal FCD               | L frontal                    | L frontal                |                                                                     |                                                                                                        |                                                        |
| 20/9.0/F          | 0.3                       | 8                         | Normal                      | L frontal and parietal       | L frontal and parietal   | L frontal and rolandic <sup>a</sup>                                 |                                                                                                        |                                                        |
| 21/15.1/F         | 14                        | 1                         | L temporal FCD              | L temporal                   | L temporal               | No invasive monitoring, but underwent L anterior temporal lobectomy | FCD                                                                                                    | Seizure-free (1 yr)                                    |
| 22/14.0/F         | 3                         | 11                        | Normal                      | R frontal                    | R frontal                |                                                                     |                                                                                                        |                                                        |
| 23/16.2/F         | 6                         | 10                        | R parietal FCD              | R parietal and occipital     | R parietal and occipital |                                                                     |                                                                                                        |                                                        |
| 24/12.7/M         | 11                        | 1                         | Normal                      | L frontal                    | L frontal                | L frontal and L perisylvian region                                  | FCD                                                                                                    | >50% improvement (1 yr)                                |

**Note:**—R indicates right; L, left.

<sup>a</sup>Did not proceed to resection due to involvement of motor cortex.

**On-line Table 2: x-, y-, and z-axes of MNI coordinates of FCD, MEG dipole cluster, FA, MD, and  $\lambda_1$ ,  $\lambda_2$ , and  $\lambda_3$  in patients with MRI-visible FCD**

| No. | FCD               |                     |                    | MEG Dipole Cluster |                     |                    | FA                    |                       |                       | MD                   |                       |                       | $\lambda_1$         |                     |                    | $\lambda_2$           |                       |                       | $\lambda_3$          |                       |                       |
|-----|-------------------|---------------------|--------------------|--------------------|---------------------|--------------------|-----------------------|-----------------------|-----------------------|----------------------|-----------------------|-----------------------|---------------------|---------------------|--------------------|-----------------------|-----------------------|-----------------------|----------------------|-----------------------|-----------------------|
|     | x                 | y                   | z                  | x                  | y                   | z                  | x                     | y                     | z                     | x                    | y                     | z                     | x                   | y                   | z                  | x                     | y                     | z                     | x                    | y                     | z                     |
| 1   | 2-13 <sup>a</sup> | -16-15 <sup>a</sup> | 43-49 <sup>a</sup> | 2-55 <sup>a</sup>  | -23-33 <sup>a</sup> | 29-53 <sup>a</sup> | -3-31 <sup>a</sup>    | 21-26 <sup>a</sup>    | 31-37 <sup>a</sup>    | -50-36 <sup>a</sup>  | -21-12 <sup>a</sup>   | 51-58 <sup>a</sup>    | -19-17 <sup>a</sup> | -23-7 <sup>a</sup>  | 25-39 <sup>a</sup> | -58-26 <sup>a</sup>   | -25-38 <sup>a</sup>   | -6-55 <sup>a</sup>    | -41-1 <sup>a</sup>   | -27-31 <sup>a</sup>   | -12-47 <sup>a</sup>   |
| 5   | -39-19            | -19-11              | 53-64              | -57-20             | -35-9               | 11-64              | -32-29                | 23-24                 | 32-36                 | -56-1 <sup>b,c</sup> | -26-38 <sup>b,c</sup> | 2-60 <sup>b,c</sup>   | -22-16 <sup>a</sup> | -21-6 <sup>b</sup>  | 31-39 <sup>b</sup> | -59-0 <sup>b,c</sup>  | -65-58 <sup>b,c</sup> | -26-60 <sup>b,c</sup> | -42-41 <sup>a</sup>  | -10-9 <sup>b</sup>    | 25-26 <sup>b</sup>    |
| 9   | -67-17            | -39-24              | -45-3              | -67-14             | -52-55              | -37-32             | -35-29                | 22-25                 | 33-37                 | N                    | N                     | N                     | -27-20 <sup>b</sup> | -13-10 <sup>b</sup> | 26-39 <sup>b</sup> | -43-32 <sup>b</sup>   | 30-38 <sup>b</sup>    | -4-6 <sup>b</sup>     | -42-4 <sup>b,c</sup> | -27-62 <sup>b,c</sup> | -12-34 <sup>b,c</sup> |
| 10  | -55-3             | -71-16              | 35-68              | -62-1              | -67-17              | 3-73               | -31-28                | 20-22                 | 34-37                 | -57-1 <sup>b,c</sup> | -25-64 <sup>b,c</sup> | -27-61 <sup>b,c</sup> | 20 <sup>a</sup>     | -13 <sup>a</sup>    | 39 <sup>a</sup>    | -57-5 <sup>b,c</sup>  | -24-38 <sup>b,c</sup> | -24-39 <sup>b,c</sup> | -41 <sup>b</sup>     | -10 <sup>b</sup>      | 26 <sup>b</sup>       |
| 18  | -59-23            | -3-21               | -37-19             | -67-40             | -44-3               | -25-17             | -35-24                | -13-30                | 25-50                 | -50 <sup>b</sup>     | -16 <sup>b</sup>      | -18 <sup>b</sup>      | 19-22 <sup>a</sup>  | -15-10 <sup>a</sup> | 34-35 <sup>a</sup> | -50 <sup>b</sup>      | -14 <sup>b</sup>      | -18 <sup>b</sup>      | -42                  | -10-9                 | 25-26                 |
| 19  | -32-21            | -16-1               | 43-53              | -58-1              | -90-50              | -19-69             | -46-36 <sup>b,c</sup> | -39-28 <sup>b,c</sup> | -16-51 <sup>b,c</sup> | -50-7 <sup>b,c</sup> | -26-32 <sup>b,c</sup> | -15-58 <sup>b,c</sup> | -33-25 <sup>b</sup> | -32-22 <sup>b</sup> | 13-49 <sup>b</sup> | -56-49 <sup>b,c</sup> | -66-52 <sup>b</sup>   | -48-60 <sup>b</sup>   | -43-0 <sup>a</sup>   | -25-60 <sup>b</sup>   | -14-35 <sup>b</sup>   |
| 21  | -55-18            | -13-20              | -43-20             | -67-17             | -20-1               | -34-9              | -31                   | 23                    | 36                    | -29                  | -17                   | 53                    | 19-21 <sup>a</sup>  | -20-10 <sup>a</sup> | 35-36 <sup>a</sup> | -48-25 <sup>b</sup>   | -21-37 <sup>b</sup>   | -19-57 <sup>b</sup>   | -39-32               | -9-7                  | 20-26                 |
| 23  | 4-27              | -73-55              | 21-28              | 1-43               | -86-17              | 14-43              | -40-18                | -9-1                  | 40-44                 | -22-1                | 19-36                 | -11-51                | 17-19 <sup>b</sup>  | -18-15 <sup>b</sup> | 35-37 <sup>b</sup> | -39                   | 30                    | -7                    | -43-34               | -15-9                 | 25-51                 |

**Note:**—N indicates negative.  
<sup>a</sup> DTI abnormality contralateral to lesion and the MEG dipole cluster.  
<sup>b</sup> DTI abnormality overlaps with MRI-visible FCD in all 3 x-, y-, and z-axes.  
<sup>c</sup> DTI abnormality overlaps with the MEG dipole cluster in all 3 x-, y-, and z-axes.

**On-line Table 3: x-, y-, and z-axes of MNI coordinates of MEG dipole cluster, FA, MD, and  $\lambda_1$ ,  $\lambda_2$ , and  $\lambda_3$  in patients with MRI-negative localization-related epilepsy**

| No. | MEG Dipole Cluster |        |        | FA                  |                     |                    | MD                  |                     |                     | $\lambda_1$         |                     |                     | $\lambda_2$         |                     |                     | $\lambda_3$         |                     |                    |                     |
|-----|--------------------|--------|--------|---------------------|---------------------|--------------------|---------------------|---------------------|---------------------|---------------------|---------------------|---------------------|---------------------|---------------------|---------------------|---------------------|---------------------|--------------------|---------------------|
|     | x                  | y      | z      | x                   | y                   | z                  | x                   | y                   | z                   | x                   | y                   | z                   | x                   | y                   | z                   | x                   | y                   | z                  |                     |
| 2   | -63-1              | -33-55 | -3-76  | -35-32 <sup>a</sup> | 26-27 <sup>a</sup>  | 34-36 <sup>a</sup> | -57-36 <sup>a</sup> | -24-14 <sup>a</sup> | -23-57 <sup>a</sup> | 19-22               | -23-10              | -23-10              | 34-37               | 57-25 <sup>a</sup>  | -24-41 <sup>a</sup> | -23-41 <sup>a</sup> | -43-39 <sup>a</sup> | -9-28 <sup>a</sup> | 0-26 <sup>a</sup>   |
| 3   | 1-62               | -48-27 | 10-78  | -34-31              | 21-25               | 36-37              | -39-35              | -23-15              | 50-60               | 19 <sup>a</sup>     | -10 <sup>a</sup>    | -10 <sup>a</sup>    | 35 <sup>a</sup>     | -55-1 <sup>a</sup>  | -23-59 <sup>a</sup> | -27-61 <sup>a</sup> | -42-38              | -10-9              | 24-25               |
| 4   | -69-3              | -39-53 | -36-71 | -29 <sup>a</sup>    | 24 <sup>a</sup>     | 33 <sup>a</sup>    | -53-34 <sup>a</sup> | -24-25 <sup>a</sup> | -23-58 <sup>a</sup> | 19-20               | -11-10              | -11-10              | 34-35               | -44-38              | 29-37               | -4-35               | -44-38 <sup>a</sup> | -10-8 <sup>a</sup> | 24-25 <sup>a</sup>  |
| 6   | 1-61               | -99-24 | 34-53  | -30-24              | -8-0                | 32-47              | -49-48              | -21-20              | -20                 | -17                 | -6                  | -6                  | 33-39               | -57-30              | -24-38              | -22-0               | -38-21              | -23-8              | 24-35               |
| 7   | 1-53               | -22-68 | -12-52 | -31                 | 21                  | 32-35              | -56-7               | -24-27              | -38-58              | 19-23 <sup>a</sup>  | -20-10 <sup>a</sup> | -20-10 <sup>a</sup> | 34-45 <sup>a</sup>  | -48-26              | 29-38               | -4-7                | -43-42              | -9                 | 23-25               |
| 8   | 23-65              | -50-30 | -9-44  | 49-50               | -49                 | 45                 | -34-1               | 7-43                | -26-20              | -45-43              | 17-21               | 17-21               | 13                  | -48-4               | -69-62              | -39-53              | -56-0               | -82-33             | -12-47              |
| 11  | -19-66             | -15-16 | 19-62  | -31                 | 23                  | 36                 | -57-36              | -24-13              | -23-57              | -17-16a             | -17-7 <sup>a</sup>  | -17-7 <sup>a</sup>  | 31-35 <sup>a</sup>  | -43-41              | 36-37               | -6-0                | -42                 | -9                 | 25                  |
| 12  | -49-4              | -36-4  | 30-61  | -31-26 <sup>a</sup> | -5-21 <sup>a</sup>  | 33-46 <sup>a</sup> | -57-0 <sup>a</sup>  | -24-39 <sup>a</sup> | 0-61 <sup>a</sup>   | 19-20               | -13-10              | -13-10              | 32-39               | -57-26 <sup>a</sup> | -23-41 <sup>a</sup> | -8-39 <sup>a</sup>  | -42-11              | -8-61              | 24-26               |
| 13  | -67-1              | -40-37 | -8-67  | -29-28 <sup>a</sup> | -4-21 <sup>a</sup>  | 36-42 <sup>a</sup> | -57-1 <sup>a</sup>  | -24-24 <sup>a</sup> | -19-56 <sup>a</sup> | 18-19               | -15-10              | -15-10              | 34-35               | -43-30              | 37-39               | 0-1                 | -42 <sup>a</sup>    | -9 <sup>a</sup>    | 25 <sup>a</sup>     |
| 14  | -62-20             | -37-2  | 8-61   | -34-26 <sup>a</sup> | -7-25 <sup>a</sup>  | 31-47 <sup>a</sup> | -57-38 <sup>a</sup> | -24-16 <sup>a</sup> | -21-53 <sup>a</sup> | 19-21               | -19-13              | -19-13              | 31-39               | -57 <sup>a</sup>    | -24 <sup>a</sup>    | 19 <sup>a</sup>     | -42 <sup>a</sup>    | -9 <sup>a</sup>    | 25 <sup>a</sup>     |
| 15  | -64-4              | -83-21 | -3-64  | -29                 | 21                  | 35                 | -50-0 <sup>a</sup>  | -24-39 <sup>a</sup> | -40-66 <sup>a</sup> | -26-16 <sup>a</sup> | -17-7 <sup>a</sup>  | -17-7 <sup>a</sup>  | 25-39 <sup>a</sup>  | -29-2 <sup>a</sup>  | -18-37 <sup>a</sup> | -27-56 <sup>a</sup> | -41 <sup>a</sup>    | -10 <sup>a</sup>   | 26-47 <sup>a</sup>  |
| 16  | -68-13             | -49-22 | 25-62  | -32-29 <sup>a</sup> | 21-24 <sup>a</sup>  | 32-36              | -57-50              | -24-20              | -23-19              | 20-22               | -20-13              | -20-13              | 34-39               | -34                 | -25                 | 5                   | -42-39 <sup>a</sup> | -9-7 <sup>a</sup>  | 24-26 <sup>a</sup>  |
| 17  | -61-1              | -29-45 | 7-70   | -41-23 <sup>a</sup> | -25-29 <sup>a</sup> | 20-54 <sup>a</sup> | -57-7 <sup>a</sup>  | -24-16 <sup>a</sup> | -19-53 <sup>a</sup> | -69-2 <sup>a</sup>  | -49-42 <sup>a</sup> | -49-42 <sup>a</sup> | -34-61 <sup>a</sup> | -24-37 <sup>a</sup> | -24-37 <sup>a</sup> | -45-65 <sup>a</sup> | -44-5 <sup>a</sup>  | 18-58 <sup>a</sup> | -12-26 <sup>a</sup> |
| 20  | -60-1              | -71-61 | -11-80 | -33-20 <sup>a</sup> | 1-19 <sup>a</sup>   | 15-37 <sup>a</sup> | -5-3 <sup>a</sup>   | 27-32 <sup>a</sup>  | 12 <sup>a</sup>     | -28-13 <sup>a</sup> | -29-18 <sup>a</sup> | -29-18 <sup>a</sup> | 27-44 <sup>a</sup>  | -44-25 <sup>a</sup> | 27-38 <sup>a</sup>  | -7-39 <sup>a</sup>  | -44-42 <sup>a</sup> | -9-7 <sup>a</sup>  | 26-27 <sup>a</sup>  |
| 22  | 1-53               | -39-45 | -16-65 | -38-28              | 21-25               | 35-37              | 30 <sup>a</sup>     | -20 <sup>a</sup>    | 59 <sup>a</sup>     | 28 <sup>a</sup>     | -15a                | -15a                | 34 <sup>a</sup>     | -48-28              | -59-38              | -14-6               | -42                 | -9                 | 25                  |
| 24  | -55-18             | -54-50 | -12-32 | -35-29 <sup>a</sup> | 22-26 <sup>a</sup>  | 32-37 <sup>a</sup> | -56-1 <sup>a</sup>  | -26-38 <sup>a</sup> | 0-58 <sup>a</sup>   | -18 <sup>a</sup>    | -15 <sup>a</sup>    | -15 <sup>a</sup>    | -32 <sup>a</sup>    | -48-5 <sup>a</sup>  | -16-38 <sup>a</sup> | -4-36 <sup>a</sup>  | -57                 | 38                 | 27                  |

<sup>a</sup> DTI abnormality overlaps the MEG dipole cluster in all 3 x-, y-, and z-axes.
